# Supplementary material for: Modulating coal-derived carbon toward electrocatalytic generation of hydroxyl radicals for organic contaminant removal
Source: Royal Society of Chemistry journal article supplement (doi:10.1039/d3ta07082d), 2024-01-01
Supplement: d3ta07082d1.pdf [file d3ta07082d1.pdf]

## **Electronic Supplementary Information (ESI) of**

### **Modulating Coal-Derived Carbon toward Electrocatalytic Generation of Hydroxyl Radicals for Organic Contaminant Removal**

Guoqiang Zhao, Tianci Chen, Aidong Tang,\* Huaming Yang\*

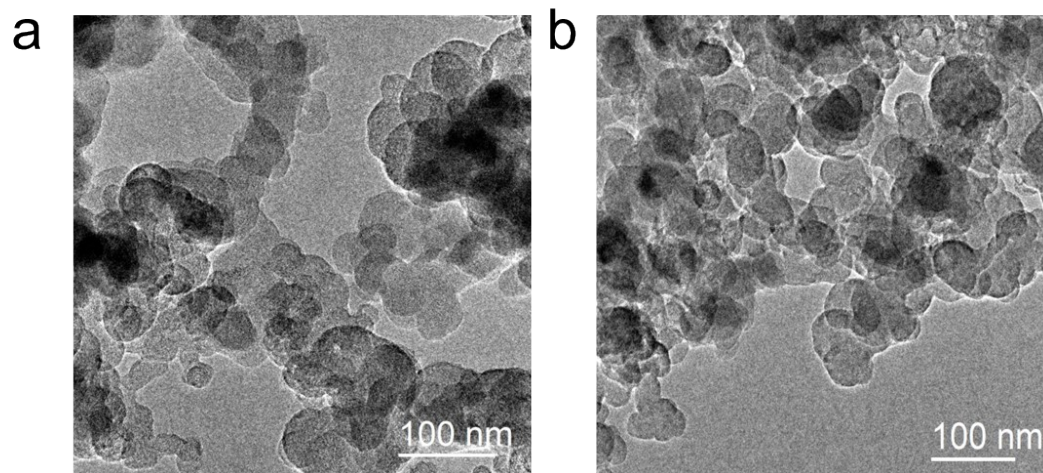

Figure S1. TEM image for CB.

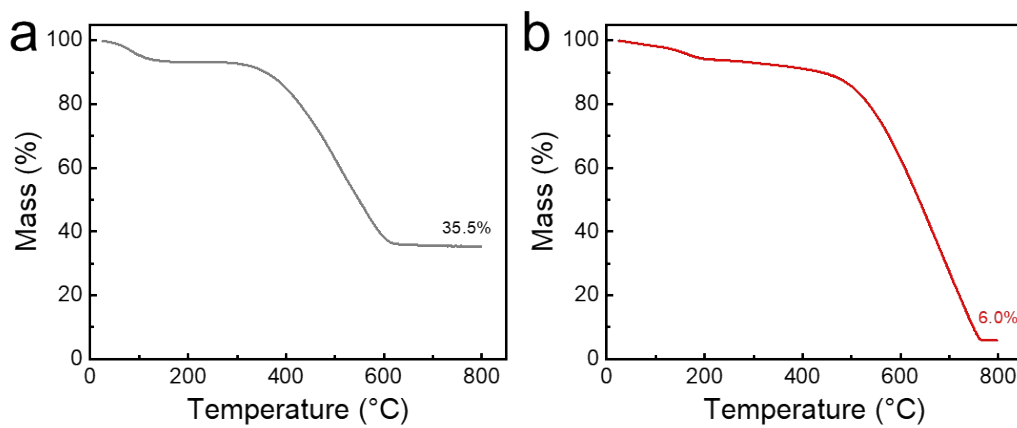

Figure S2. TG curves for (a) bituminous coal and (b) bitu@C ( $10\text{ }^{\circ}\text{C min}^{-1}$  from 25 to 800 °C in air).

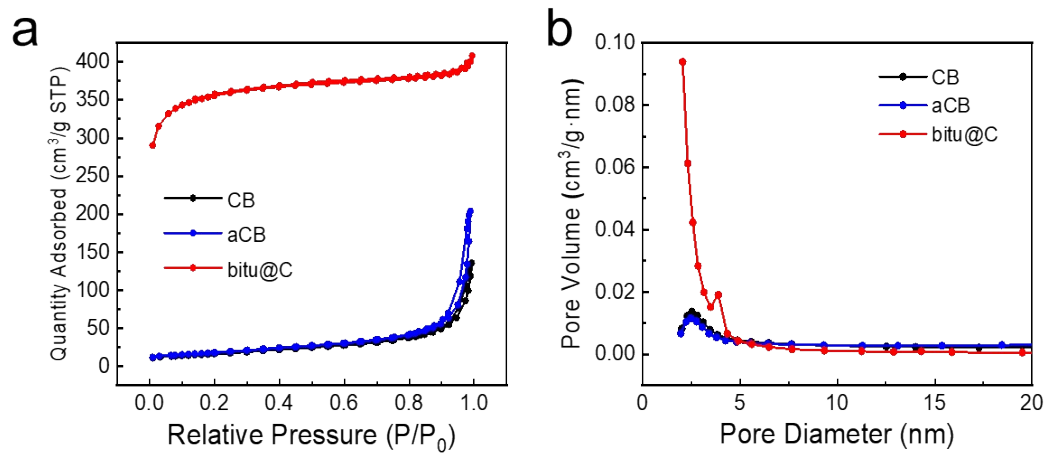

Figure S3. (a) The N<sub>2</sub> adsorption–desorption isotherm curves of CB, aCB, and bitu@C. (b) The pore-size distribution curve of CB, aCB, and bitu@C.

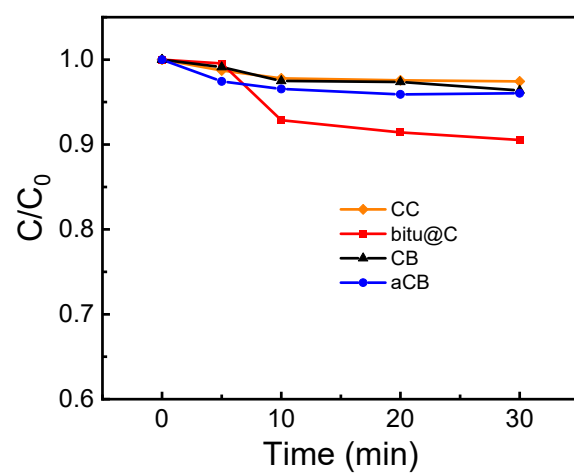

Figure S4. The relative concentration of AOII after the adsorption with different catalysts.

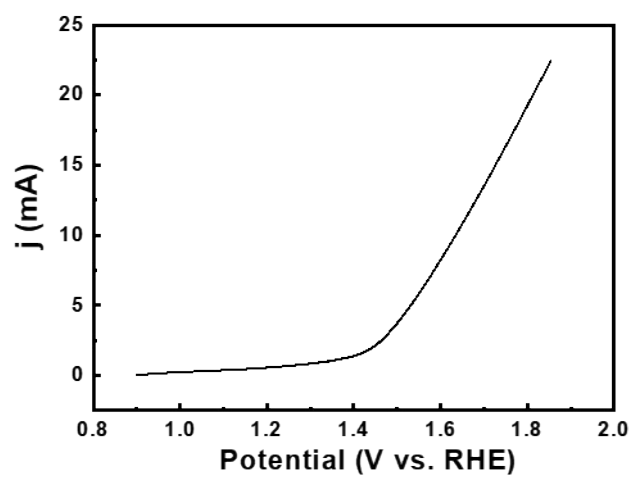

Figure S5. The LSV curve of the carbon rod electrode at the scan rate of  $2 \text{ mV s}^{-1}$ .

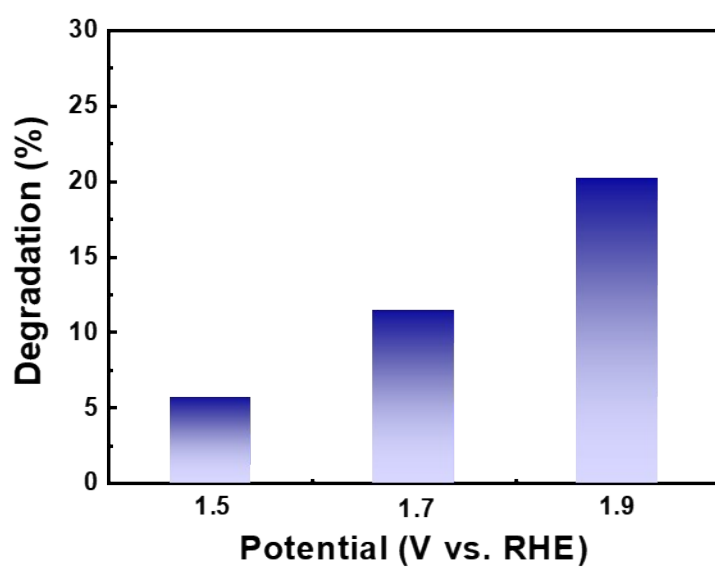

Figure S6. Contribution of the direct oxidation of AOII and the  $2e^-$  water oxidation at the carbon rod electrode to the AOII degradation in 30 min at different potentials.

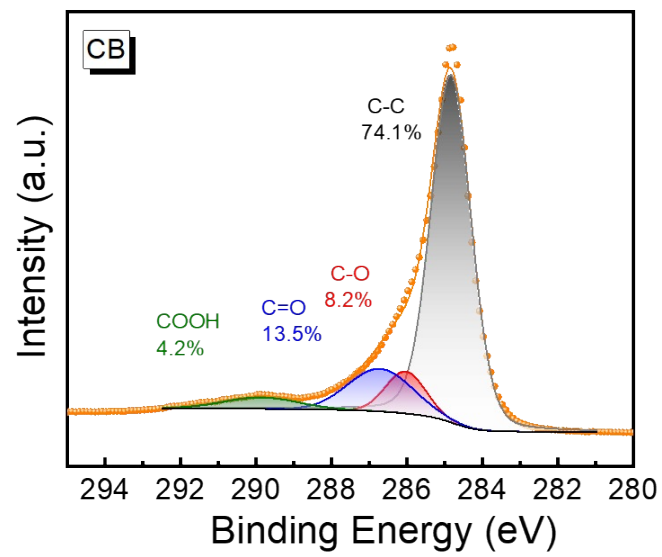

Figure S7. C 1s XPS spectra for CB.



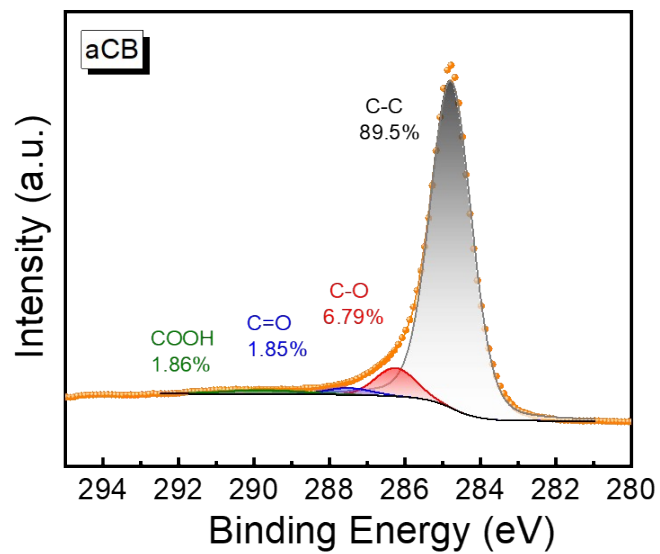

Figure S8. C 1s XPS spectra for aCB.

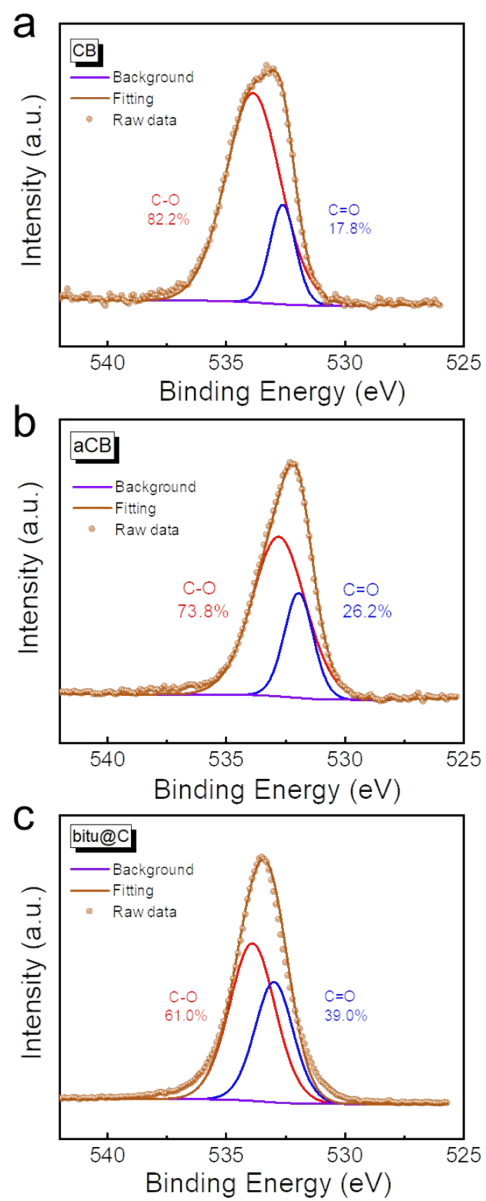

Figure S9. O 1s XPS spectra for CB, aCB, and bitu@C.

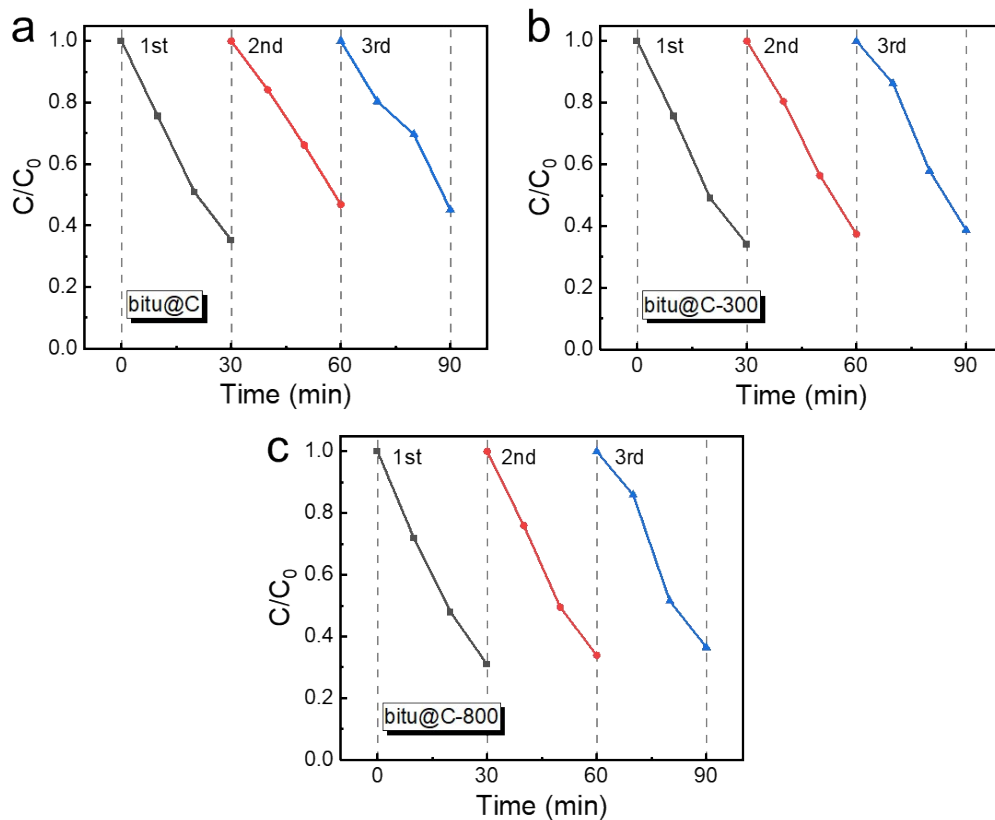

Figure S10. Three consecutive AOII degradation tests of a) bitu@C, b) bitu@C-300, and c) bitu@C-800. The electrolyte was changed every 30 min.

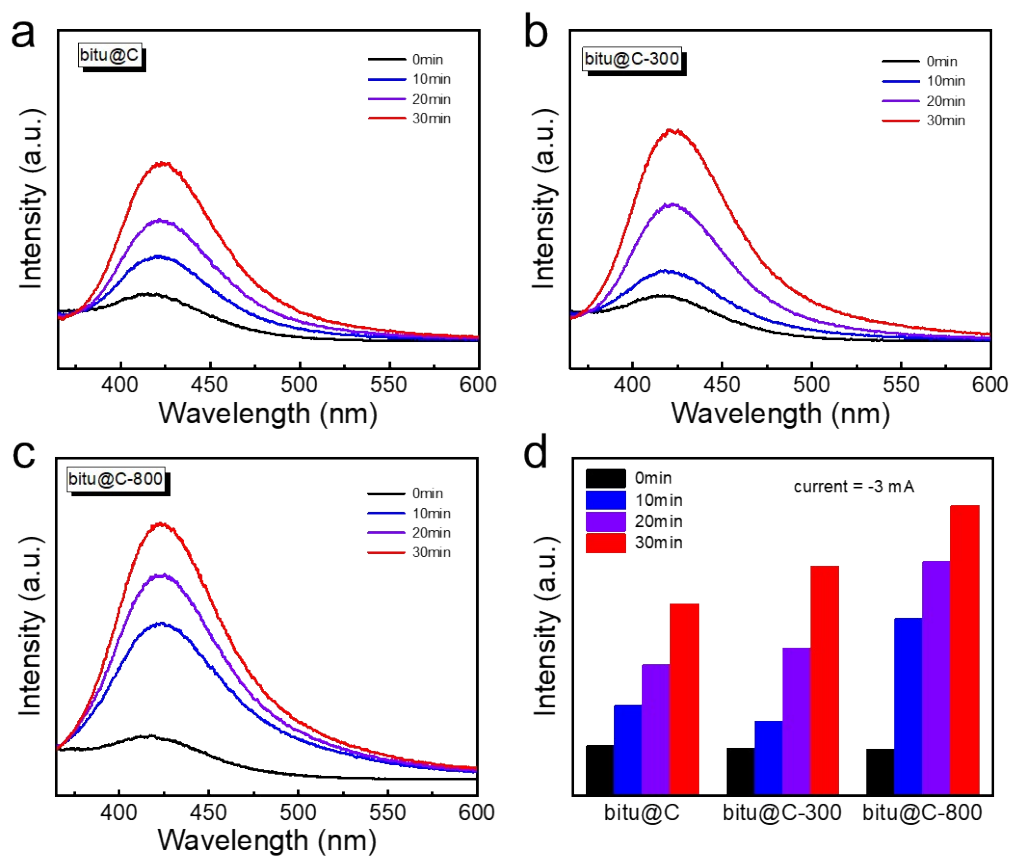

Figure S11. (a-c) UV-vis spectra of the electrolyte using a) bitu@C, b) bitu@C-300, and c) bitu@C-800 as the catalysts. The working current was set at 3 mA. (d) Value of the peak intensity of the fluorescent product.

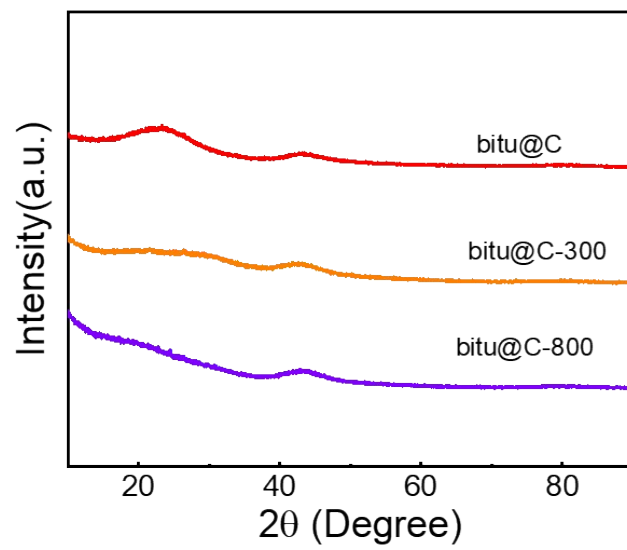

Figure S12. XRD patterns for bitu@C, bitu@C-300, and bitu@C-800.

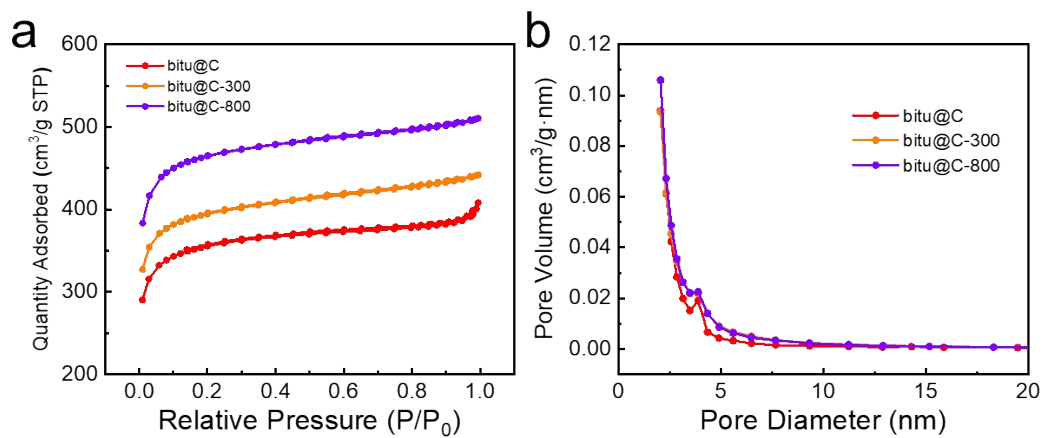

Figure S13. (a) The N<sub>2</sub> adsorption–desorption isotherm curves and (b) the corresponding pore-size distribution curves of bitu@C-300, and bitu@C-800.

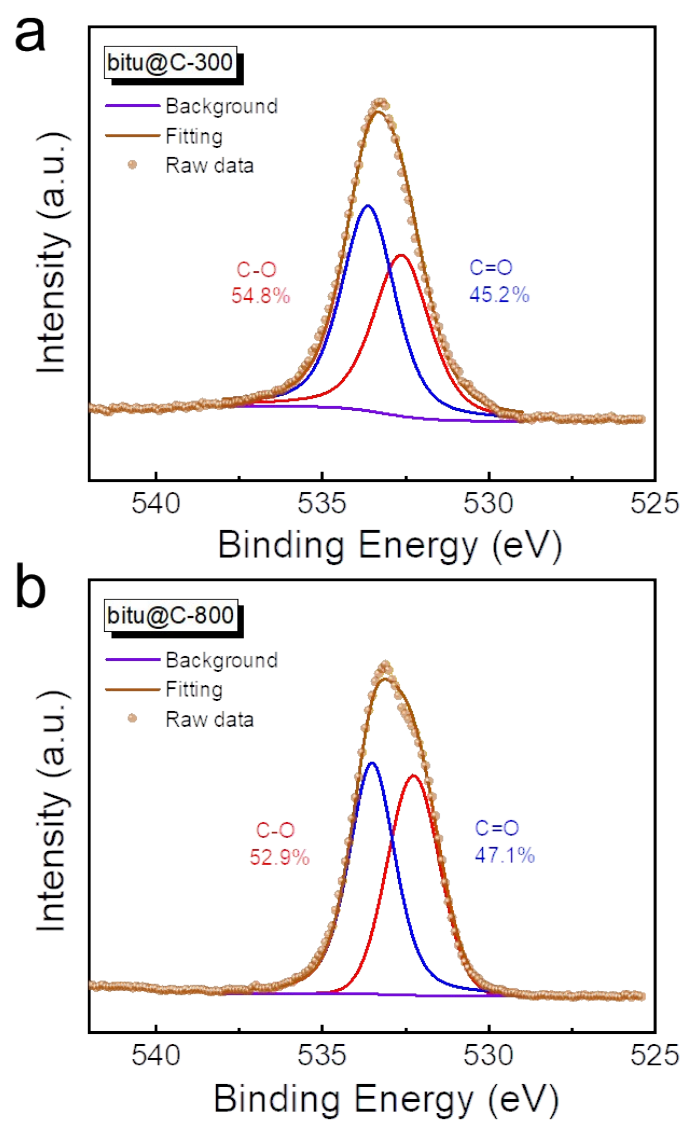

Figure S14. O 1s XPS spectra for (a) bitu@C-300 and (b) bitu@C-800.

Table S1. The calculated specific surface area ( $S_{\text{BET}}$ ), pore volume, and average pore size based on the  $\text{N}_2$  adsorption–desorption isotherm curves for CB, aCB, and bitu@C-300.

| Sample | $S_{\text{BET}}/$<br>( $\text{m}^2\cdot\text{g}^{-1}$ ) | Pore<br>volume/( $\text{cm}^3\cdot\text{g}^{-1}$ ) | Average pore<br>size/nm |
|--------|---------------------------------------------------------|----------------------------------------------------|-------------------------|
| CB     | 59.41                                                   | 0.21                                               | 13.27                   |
| aCB    | 65.60                                                   | 0.32                                               | 17.89                   |
| bitu@C | 1091.48                                                 | 0.14                                               | 3.99                    |



Table S2. The calculated specific surface area ( $S_{\text{BET}}$ ), pore volume, and average pore size based on the  $\text{N}_2$  adsorption–desorption isotherm curves for bitu@C-300 and bitu@C-800.

| Sample     | $S_{\text{BET}}/$<br>( $\text{m}^2\cdot\text{g}^{-1}$ ) | Pore<br>volume/( $\text{cm}^3\cdot\text{g}^{-1}$ ) | Average pore<br>Size/nm |
|------------|---------------------------------------------------------|----------------------------------------------------|-------------------------|
| bitu@C-300 | 1207.54                                                 | 0.15                                               | 3.54                    |
| bitu@C-800 | 1415.61                                                 | 0.15                                               | 3.41                    |
